# Supplementary material for: Can Isotopes Be Used as Lead Tracers in Shooting-Range Soils?
Source: MDPI journal article supplement (doi:10.3390/app12178803), 2022-09-01
Supplement: s1 [file s1]

## SUPPLEMENTARY DATA

### Can Isotopes Be Used as Lead Tracers in Shooting-Range Soils?

Andrés Rodríguez-Seijo<sup>1,2,3\*</sup>, Knut Endre Sjøstad<sup>4</sup>, Vladislav Chrastný<sup>5</sup>

<sup>1</sup>Interdisciplinary Centre of Marine and Environmental Research (CIIMAR), University of Porto, Terminal de Cruzeiros do Porto de Leixões, Av. General Norton de Matos s/n, 4450-208 Matosinhos, Portugal.

<sup>2</sup>Biology Department, Faculty of Sciences, University of Porto, 4169-007 Porto, Portugal.

<sup>3</sup>Área de Edafoloxía e Química Agrícola, Facultade de Ciencias, Universidade de Vigo, 32004, Ourense, Spain.

<sup>4</sup>National Criminal Investigation Service (KRIPOS), P.O. Box 8163, 0034 Oslo, Norway.

<sup>5</sup>Faculty of Environmental Sciences, Czech University of Life Sciences Prague, Kamýcká 129, 165 21, Praha 6, Suchbát, Czech Republic ORCID: 0000-0001-8383-1755

\*Corresponding author: Andrés Rodríguez-Seijo ([andresrodriguezseijo@uvigo.es](mailto:andresrodriguezseijo@uvigo.es)).

---

Tables: 2.

**Table S1.** Operating parameter settings of the Thermo-Finnigan Neptune MC-ICP-MS and instrumental parameters for isotope ratio analysis.

| <b>General instruments parameter</b>          |                                                                            |
|-----------------------------------------------|----------------------------------------------------------------------------|
| R.F. Power (W)                                | 1200                                                                       |
| Sample gas flow rate (L min <sup>-1</sup> )   | 1.0                                                                        |
| Cooling gas flow rate (L min <sup>-1</sup> )  | 15.0                                                                       |
| Sample flow (ul/min)                          | 100                                                                        |
| <b>Isotope ratio conditions</b>               |                                                                            |
| Acquisition mode                              | Static                                                                     |
| Number of isotopes                            | <sup>204</sup> Pb, <sup>206</sup> Pb, <sup>207</sup> Pb, <sup>208</sup> Pb |
| Setting time of magnet (s)                    | 5                                                                          |
| Sample time (min)                             | 5                                                                          |
| Integration time (sec)                        | 4.13                                                                       |
| Runs/passes                                   | 50                                                                         |
| Analysis time (min)                           | 3.5                                                                        |
| Correction lawn                               | Exponential                                                                |
| Drift correction                              | Bracketing standards                                                       |
| <b>Faraday cup configuration for solution</b> |                                                                            |
| Cup                                           | Mass                                                                       |
| L3                                            | <sup>202</sup> Hg <sup>+</sup>                                             |
| L2                                            | <sup>203</sup> Ti <sup>+</sup>                                             |
| L1                                            | <sup>204</sup> Pb <sup>+</sup>                                             |
| C                                             | <sup>204</sup> Hg <sup>+</sup>                                             |
| H1                                            | <sup>205</sup> Ti <sup>+</sup>                                             |
| H2                                            | <sup>206</sup> Pb <sup>+</sup>                                             |
| H3                                            | <sup>207</sup> Pb <sup>+</sup>                                             |
|                                               | <sup>208</sup> Pb                                                          |

**Table S2.** Pb stable isotope ratios in reference material SRM 981 (NIST).

| Isotope ratio                        | SRM 981 (NIST)      |                       |
|--------------------------------------|---------------------|-----------------------|
|                                      | Certified value     | Measured value (N=20) |
| <sup>204</sup> Pb/ <sup>206</sup> Pb | 0.059042 ± 0.000037 | 0.05882 ± 0.00230     |
| <sup>207</sup> Pb/ <sup>206</sup> Pb | 0.91464 ± 0.00033   | 0.91147 ± 0.00003     |
| <sup>208</sup> Pb/ <sup>206</sup> Pb | 2.1681 ± 0.008      | 2.16268 ± 0.00009     |
